# Supplementary material for: Mechanism of Wheat Leaf Rust Control Using Chitosan Nanoparticles and Salicylic Acid
Source: MDPI journal article supplement (doi:10.3390/jof8030304), 2022-03-16
Supplement: s1 [file s1]

Supplementary Table S1. Wheat leaf rust infection types used in disease assessment for seedling stage according to Johnston and Browder [20].

| Host response (class)         | Infection type | Disease symptoms                                                       |
|-------------------------------|----------------|------------------------------------------------------------------------|
| <b>Immune</b>                 | 0              | No uredia or other macroscopic sign of infection.                      |
| <b>Nearly immune</b>          | 0;             | No uredia but hypersensitive necrotic or chlorotic flecks present.     |
| <b>Very resistant</b>         | 1              | Small uredia surrounded by necrosis.                                   |
| <b>Moderately resistant</b>   | 2              | Small to medium uredia surrounded by chlorosis or necrosis.            |
| <b>Moderately susceptible</b> | 3              | Medium-sized uredia that may be associated with chlorosis.             |
| <b>Very susceptible</b>       | 4              | Large uredia without chlorosis or necrosis or rarely necrosis.         |
| <b>Heterogeneous</b>          | X              | Random distribution of different variable sized uredia on single leaf. |
